# Supplementary material for: Investigating telomere length in progeroid syndromes: implications for aging disorders
Source: publisher site journal article supplement (doi:10.18632/aging.206255), 2025-05-28
Supplement: Supplementary file [file aging-v17i5-206255-supplementary-material-SD1.pdf]

## SUPPLEMENTARY FIGURE

**A**

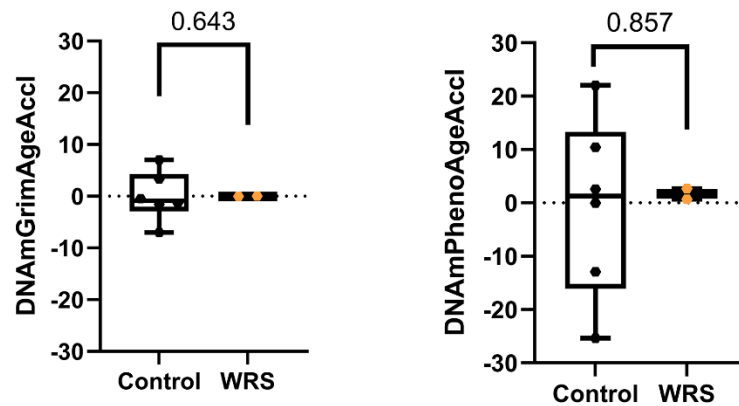

**B**

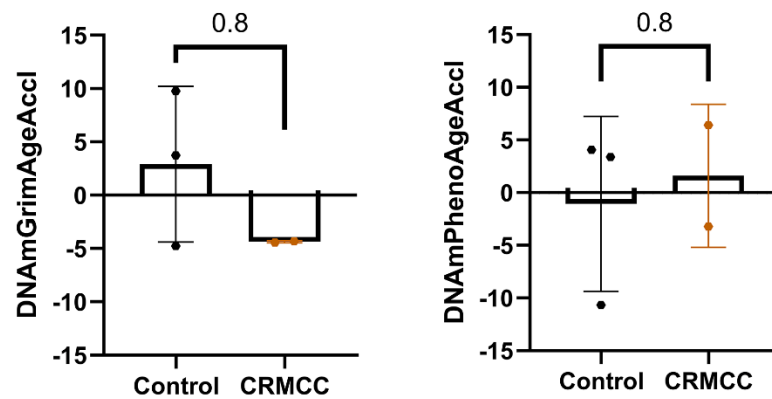

**Supplementary Figure 1. Epigenetic age acceleration between controls and WRS patients.** (A) Boxplots display epigenetic age acceleration, measured using the GrimAge and PhenoAge clocks, showing no significant differences between controls (n = 6) and WRS patients (n = 2). Statistical significance was assessed using a two-tailed Wilcoxon rank-sum test and Student's t-test for GrimAge and PhenoAge clocks, respectively. Epigenetic age acceleration between controls (n = 3) and CRMCC patients (n = 2): (B) Boxplots with individual data points illustrate insignificant differences in epigenetic age acceleration, as measured using the GrimAge and PhenoAge clocks. Statistical significance was assessed using a two-tailed Wilcoxon rank-sum test.
